# Supplementary material for: Pulmonary Aerosol Delivery of Let‐7b microRNA Confers a Striking Inhibitory Effect on Lung Carcinogenesis through Targeting the Tumor Immune Microenvironment
Source: PubMed Central journal article supplement (PMC8425922; doi:10.1002/advs.202100629), 2021-07-08
Supplement: ADVS-8-2100629-s001.pdf [file ADVS-8-2100629-s001.pdf]

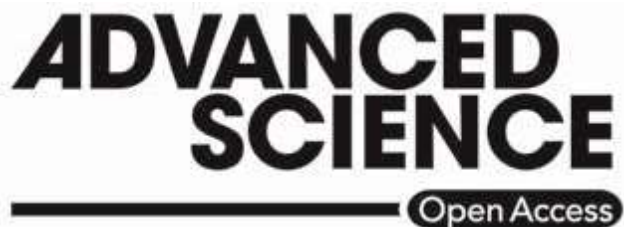

## Supporting Information

for *Adv. Sci.*, DOI: 10.1002/advs.202100629

### **Pulmonary Aerosol Delivery of Let-7b microRNA Confers a Striking Inhibitory Effect on Lung Carcinogenesis through Targeting the Tumor Immune Microenvironment**

Qi Zhang<sup>1,2#</sup>, Jing Pan<sup>1,2#</sup>, Donghai Xiong<sup>1,2</sup>, Yian Wang<sup>1,2</sup>, Mark Steven Miller<sup>3</sup>, Shizuko Sei<sup>3</sup>, Robert H Shoemaker<sup>3</sup>, Alberto Izzotti<sup>4,5</sup> and Ming You<sup>1,2\*</sup>

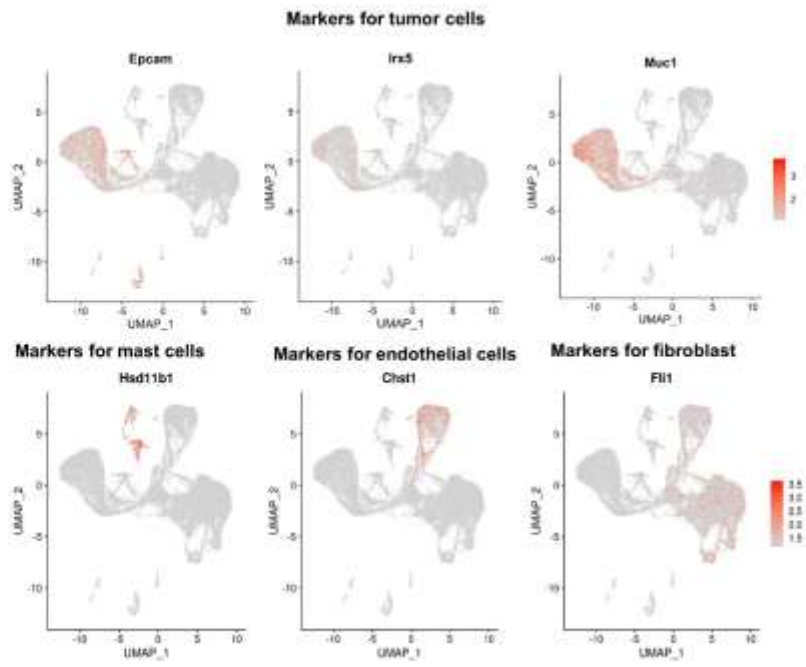

Expression of marker genes for each cell clusters of Cd45- flow sorted single cells

Supplemental figureS2

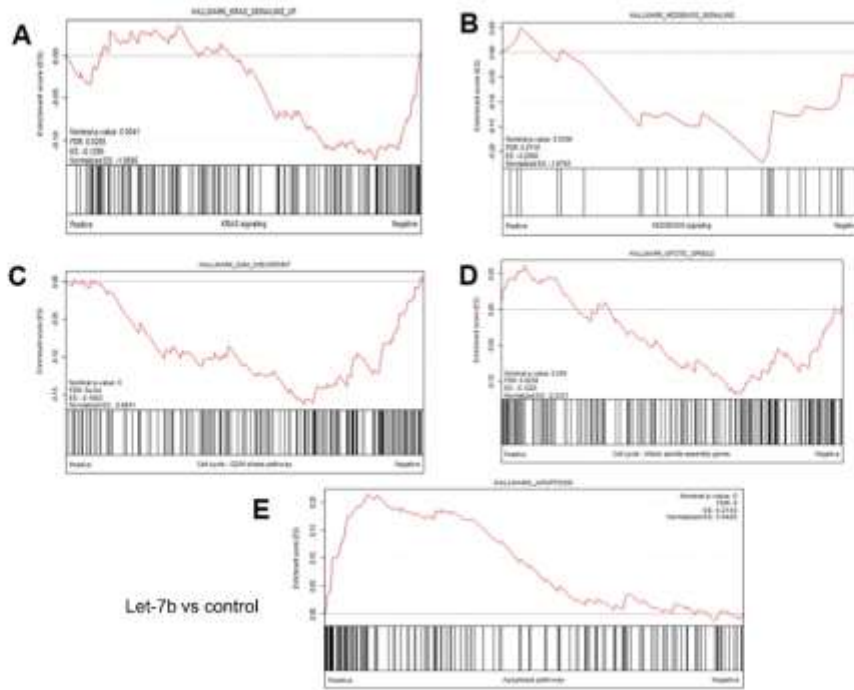

Pathway analysis of scRNA-seq data comparing let-7b treatment to control group.

Supplemental figure S3

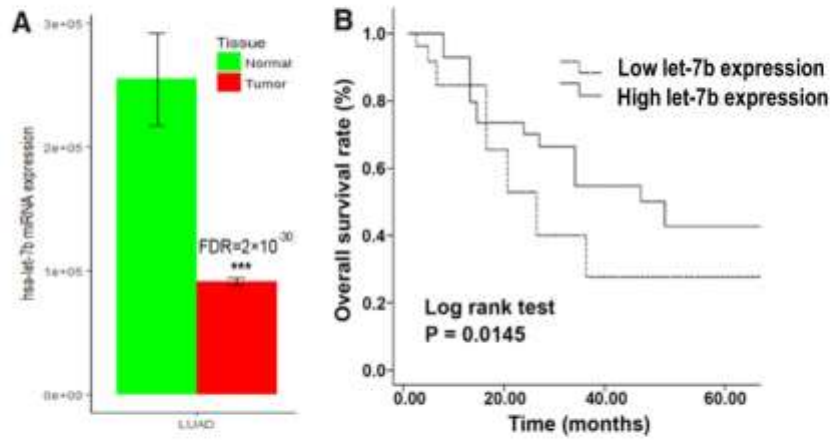

Human let-7b expression was decreased in the lung adenocarcinoma tumor samples compared to the control normal lung tissues from TCGA project. The low expression of let-7b was also associated with worse overall survival outcome of lung cancer patients.

Supplemental figure S4

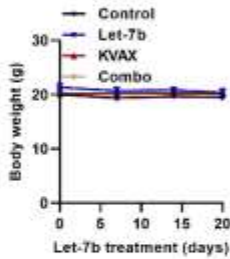

Body weight changes of aerosolized let-7b miRNA or KVAX in the LKR13 lung cancer model
